# Supplementary material for: Organometallic synthesis of a high-density Pt single atom catalyst on nickel for the alkaline hydrogen evolution reaction
Source: Royal Society of Chemistry journal article supplement (doi:10.1039/d4ya00398e), 2024-01-01
Supplement: d4ya00398e1.pdf [file d4ya00398e1.pdf]

**Organometallic Synthesis of High-density Pt Single Atom Catalyst on Nickel for Alkaline  
Hydrogen Evolution Reaction**

Vineesh Thazhe Veetil<sup>#</sup>, Manoj Shanmugasundaram<sup>#</sup>, David Zitoun

Department of Chemistry and Bar Ilan Institute of Nanotechnology and Advanced Materials  
(BINA), Bar Ilan University, Ramat Gan, Israel

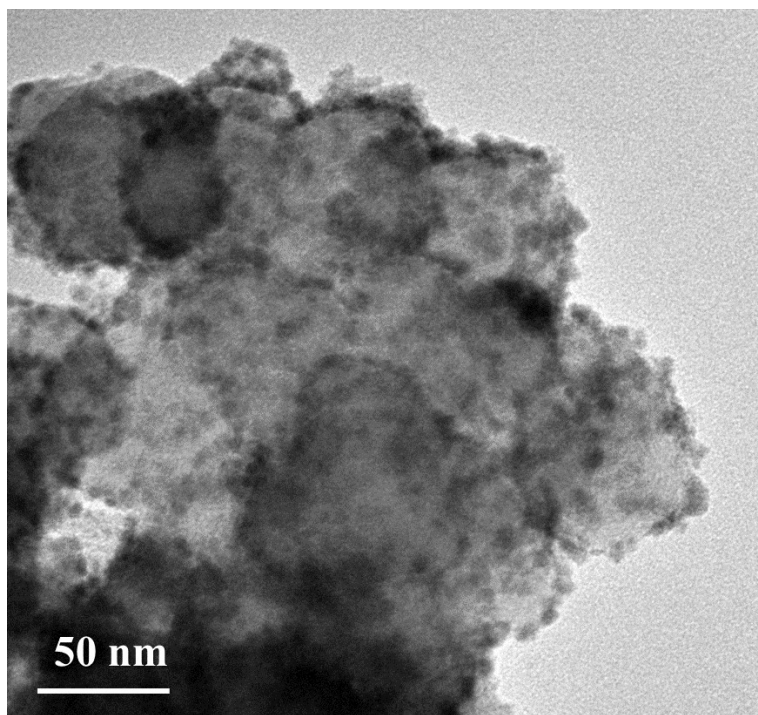

Figure S1. TEM image of NiPt-5/C

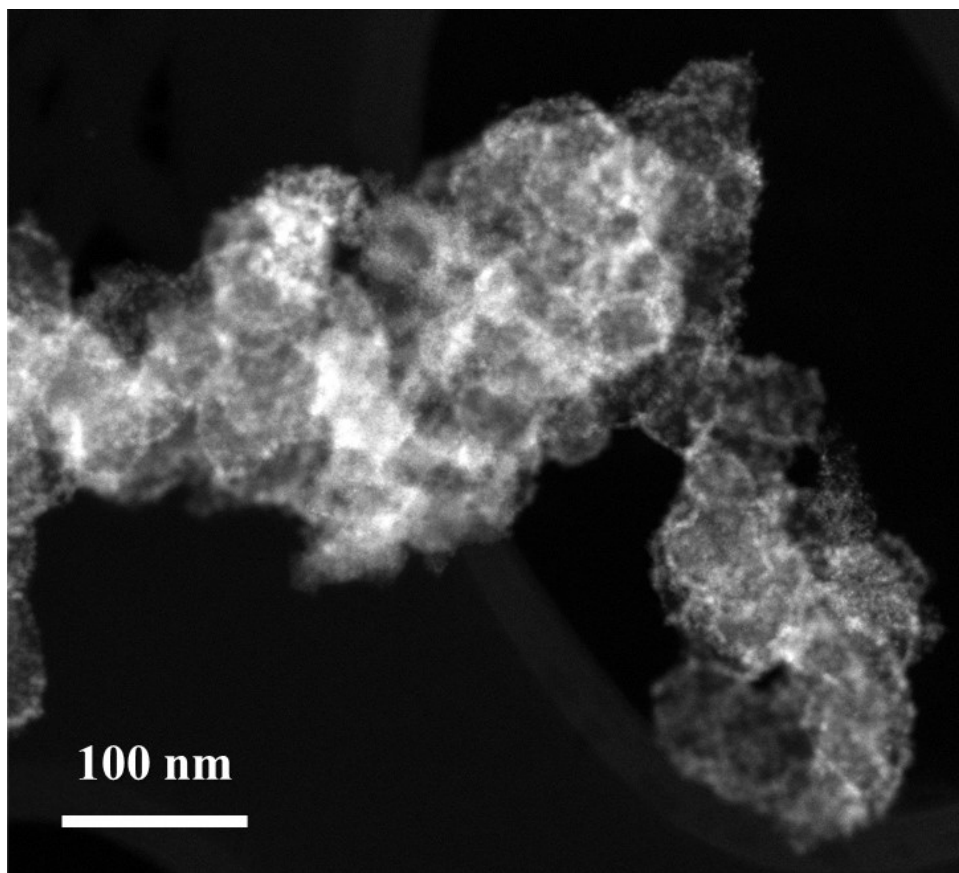

Figure S2. HAADF-STEM image of NiPt-10/C

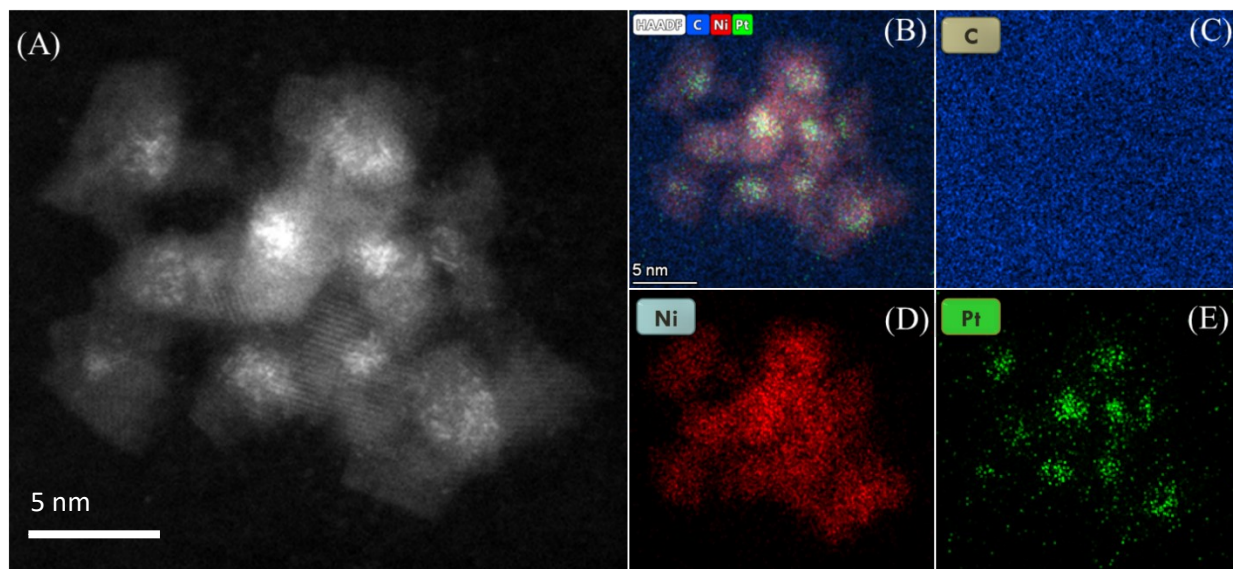

Figure S3. (A) HAADF image of NiPt-10/C (B-E) STEM –EDS mapping of different elements in NiPt-10/C

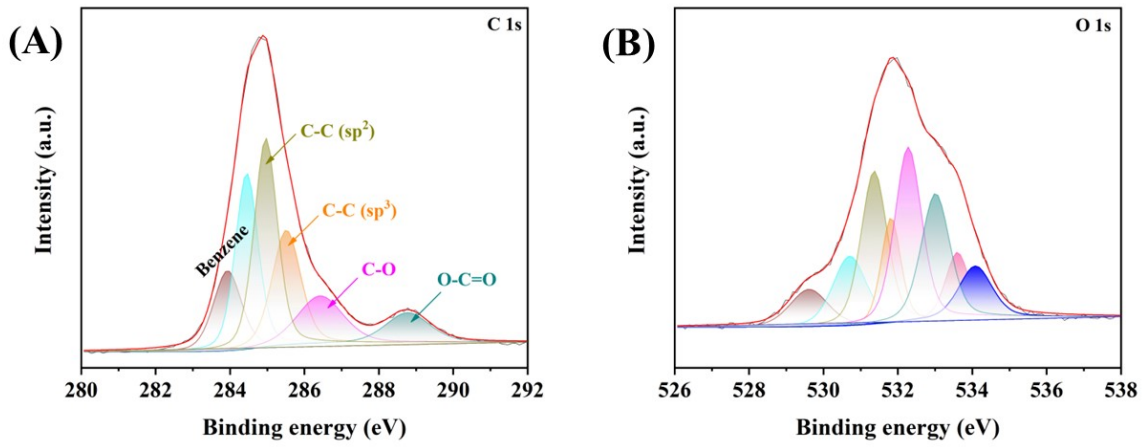

Figure.S4. XPS spectrum of NiPt-10/C. (a) C1s, and (b) O1s

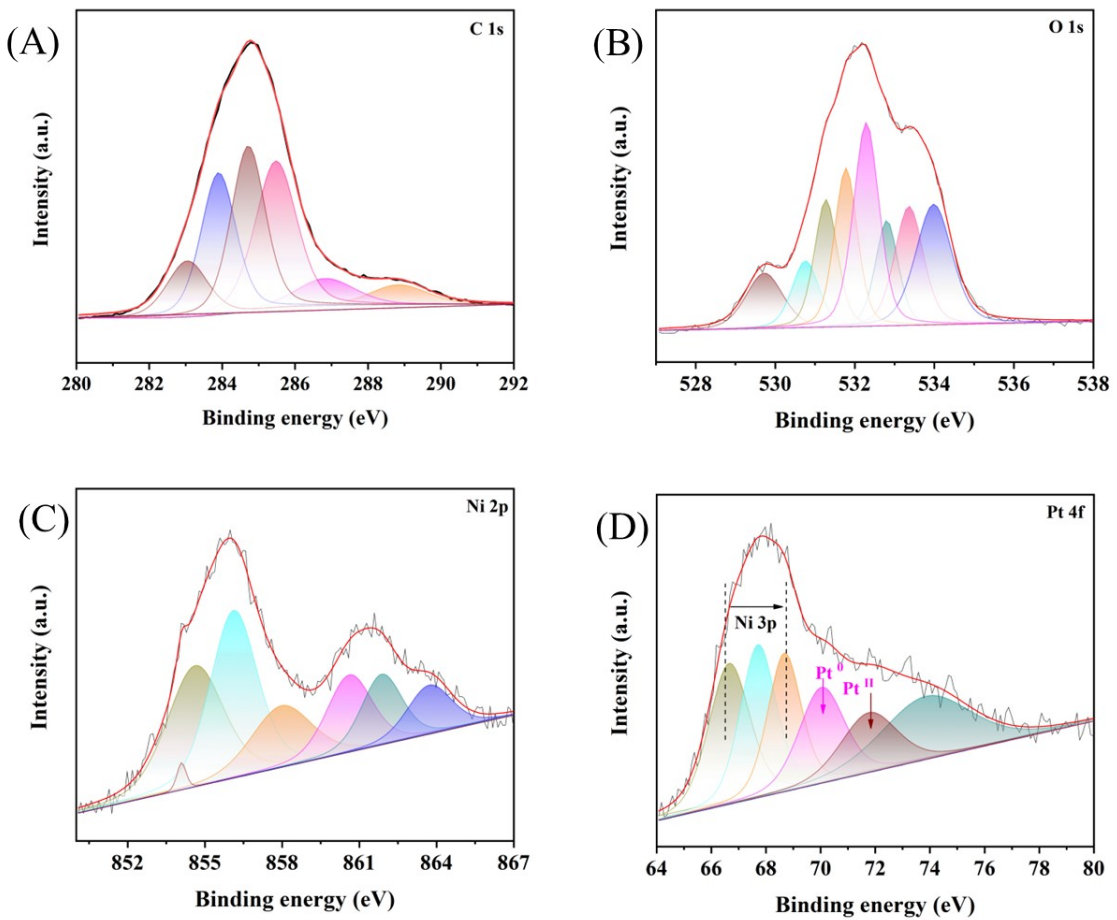

Figure.S5. XPS spectrum of NiPt-5/C. (a) C1s, (b) O1s, (c) Ni 2p and (d) Pt 4f

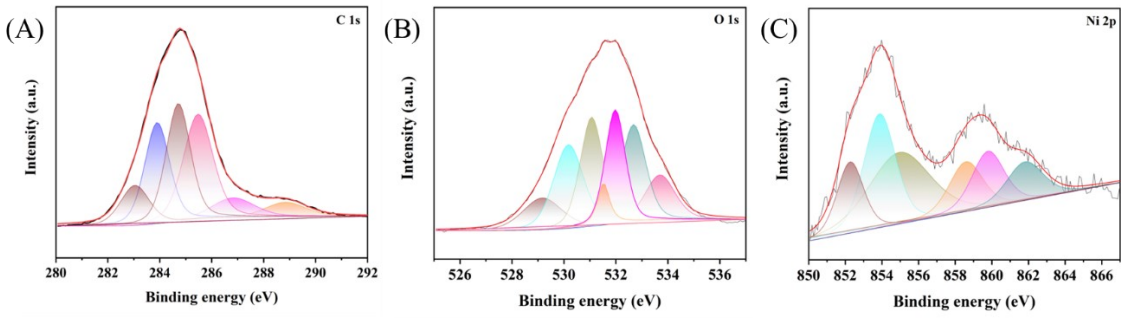

Figure S6. XPS spectrum of Ni/C. (a) C1s, (b) O1s and (c) Ni 2p

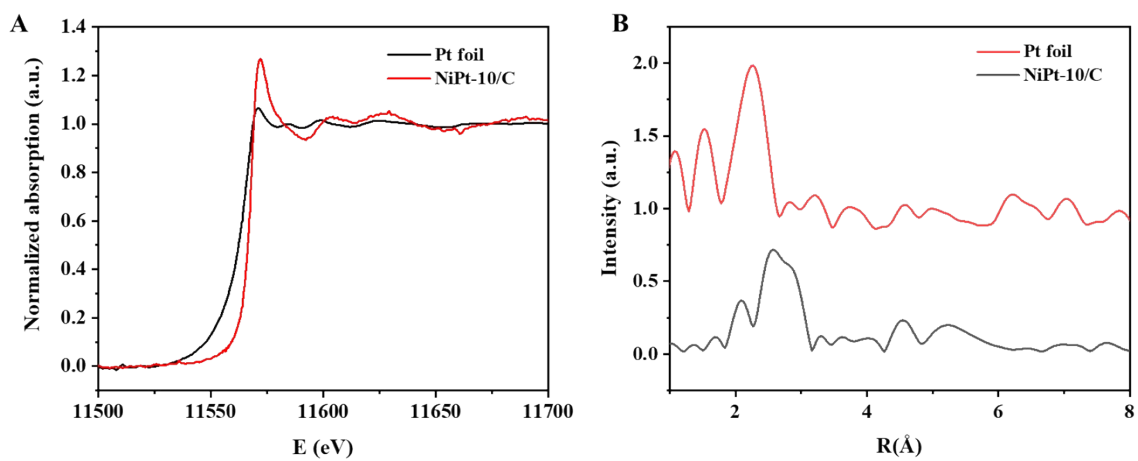

Figure S7. (A) XANES spectra of Pt foil and NiPt-10/C (B) EXAFS spectra of Pt foil and NiPt-10/C

Table. S1. NiPt based electrocatalysts for alkaline hydrogen evolution reaction

| Catalysts             | Electrolyte | Substrate | Mass activity at $\eta = 100$ mV              | Enhancement factor compared to commercial Pt catalyst mass activity at $\eta = 100$ mV | Ref       |
|-----------------------|-------------|-----------|-----------------------------------------------|----------------------------------------------------------------------------------------|-----------|
| Pt-Ni/rGO             | 0.1M KOH    | GCE       | 0.39 A mg <sup>-1</sup> <sub>pt</sub> @100 mV | 3.54                                                                                   | 1         |
| PtNi-NC-900           | 1M KOH      | GCE       | 3.78 A mg <sup>-1</sup> <sub>pt</sub> @100 mV | 3                                                                                      | 2         |
| Ni <sub>3</sub> N-Pt  | 1M KOH      | NF        | NA                                            | NA                                                                                     | 3         |
| Pt islands/Ni         | 0.1M KOH    | GCE       | NA                                            | NA                                                                                     | 4         |
| Hcp-Pt-Ni             | 0.1M KOH    | GCE       | 3.03 A mg <sub>pt</sub> <sup>-1</sup> @70mV   | 2.7                                                                                    | 5         |
| Pt-Ni heterostructure | 0.1M KOH    | GCE       | NA                                            | NA                                                                                     | 6         |
| Pt-Ni Alloy           | 0.1M KOH    | GCE       | NA                                            | NA                                                                                     | 6         |
| Pt-Ni <sub>5</sub>    | 1M KOH      |           | 6 A mg <sub>pt</sub> <sup>-1</sup> @70 mV     | 1.97                                                                                   | 7         |
| Pt <sub>3</sub> Ni/C  | 0.1M NaOH   | GCE       | NA                                            | NA                                                                                     | 8         |
| Pt-Ni SA              | 1M KOH      | GCE       | 2.80 A mg <sub>pt</sub> <sup>-1</sup> @ 70 mV | 3.2                                                                                    | 9         |
| PtNi-10/C             | 0.1M KOH    | GCE       | 0.66 A mg <sub>pt</sub> <sup>-1</sup> @100 mV | 8                                                                                      | This work |

GCE- Glassy Carbon Electrode

NF- Ni Foam

NA- Not Available

## References

- 1 Z. Du, Y. Wang, J. Li and J. Liu, *J. Nanoparticle Res.*, 2019, **21**, 1-15.
- 2 J. Guo, J. Liu, X. Zhang, X. Guan, M. Zeng, J. Shen, J. Zou, Q. Chen, T. Wang and D. Qian, *J. Mater. Chem. A*, 2022, **10**, 13727–13734.
- 3 Y. Wang, L. Chen, X. Yu, Y. Wang and G. Zheng, *Adv. Energy Mater.*, 2017, **7**, 1–7.
- 4 A. Alinezhad, L. Gloag, T. M. Benedetti, S. Cheong, R. F. Webster, M. Roelsgaard, B. B. Iversen, W. Schuhmann, J. J. Gooding and R. D. Tilley, *J. Am. Chem. Soc.*, 2019, **141**, 16202–16207.
- 5 Z. Cao, Q. Chen, J. Zhang, H. Li, Y. Jiang, S. Shen, G. Fu, B. A. Lu, Z. Xie and L. Zheng, *Nat. Commun.*, 2017, **8**, 15131.
- 6 C. Zhang, B. Chen, D. Mei and X. Liang, *J. Mater. Chem. A*, 2019, **7**, 5475–5481.
- 7 C. Zhang, X. Liang, R. Xu, C. Dai, B. Wu, G. Yu, B. Chen, X. Wang and N. Liu, *Adv. Funct. Mater.*, 2021, **31**(14), 2008298.
- 8 L. fan Shen, B. an Lu, X. ming Qu, J. yu Ye, J. ming Zhang, S. hu Yin, Q. hui Wu, R. xiang Wang, S. yu Shen, T. Sheng, Y. xia Jiang and S. gang Sun, *Nano Energy*, 2019, **62**, 601–609.
- 9 Z. Zhang, G. Liu, X. Cui, B. Chen, Y. Zhu, Y. Gong, F. Saleem, S. Xi, Y. Du, A. Borgna, Z. Lai, Q. Zhang, B. Li, Y. Zong, Y. Han, L. Gu and H. Zhang, *Adv. Mater.*, 2018, **30**, 1–7.
